# Supplementary material for: Zero-dimensional hybrid tin halides with stable broadband light emissions
Source: Royal Society of Chemistry journal article supplement (doi:10.1039/d3dt03937d), 2024-01-01
Supplement: d3dt03937d1.pdf [file d3dt03937d1.pdf]

Supporting information

# Zero-Dimensional Hybrid Tin Halides with Stable Broadband Light Emissions

Jing-Ning Lv<sup>†,a</sup>, Jie Zhang<sup>†,b</sup>, Yu-Meng Liu,<sup>a</sup> Shao-Ya Zhang,<sup>a</sup> Xiang-Yuan Deng,<sup>a</sup>

Man Xu,<sup>a</sup> Xiao-Wu Lei,<sup>a</sup> Zhi-Wei Chen,<sup>a\*</sup> Cheng-Yang Yue<sup>a\*</sup>

<sup>a</sup> School of Chemistry, Chemical Engineer and Materials, Jining University, Qufu, Shandong, 273155, P. R. China

<sup>b</sup> School of Chemistry and Chemical Engineering, Qufu Normal University, Qufu, Shandong, 273165, P. R. China

*Corresponding Authors:* Zhi-Wei Chen, Cheng-Yang Yue

*E-mail:* zw\_chen@jnxy.edu.cn, yuechengyang@126.com

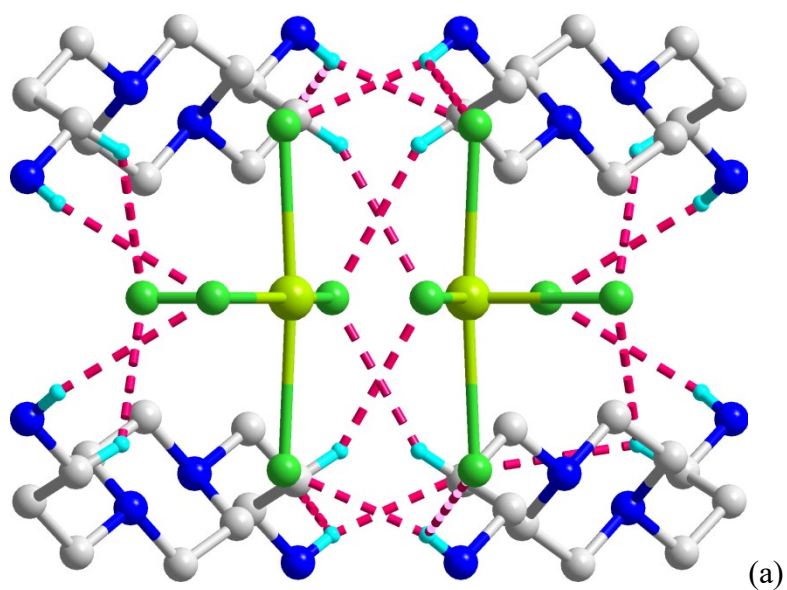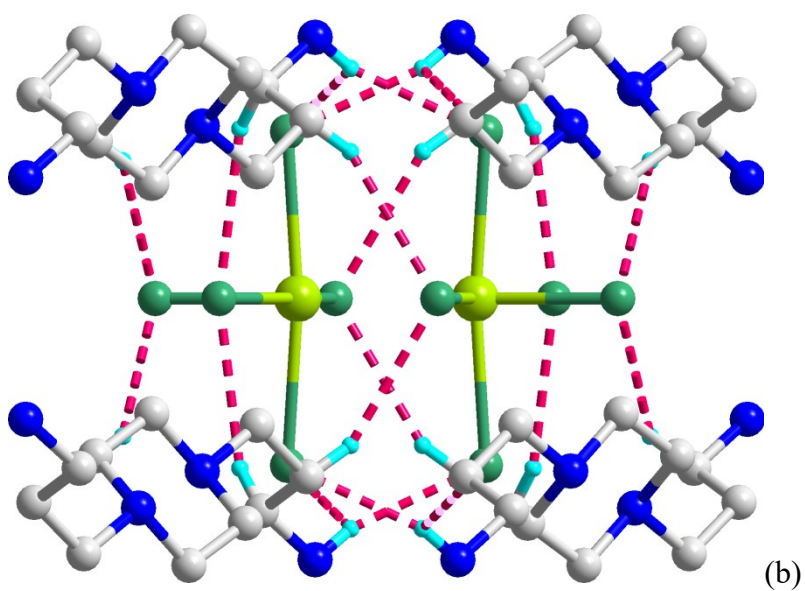

**Figure S1.** The hydrogen bonds between  $[\text{SnX}_5]^{3-}$  and  $[\text{H}_4\text{BAPP}]^{4+}$  cations in two compounds.

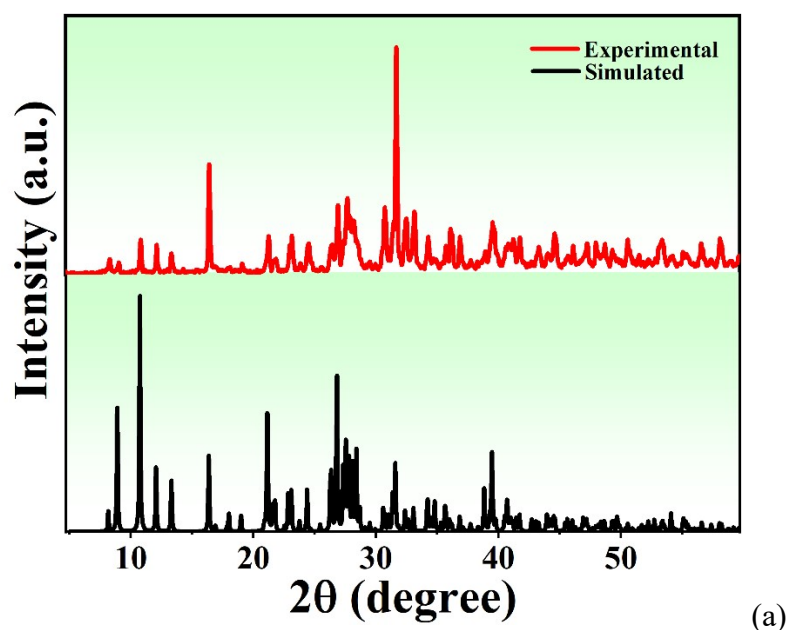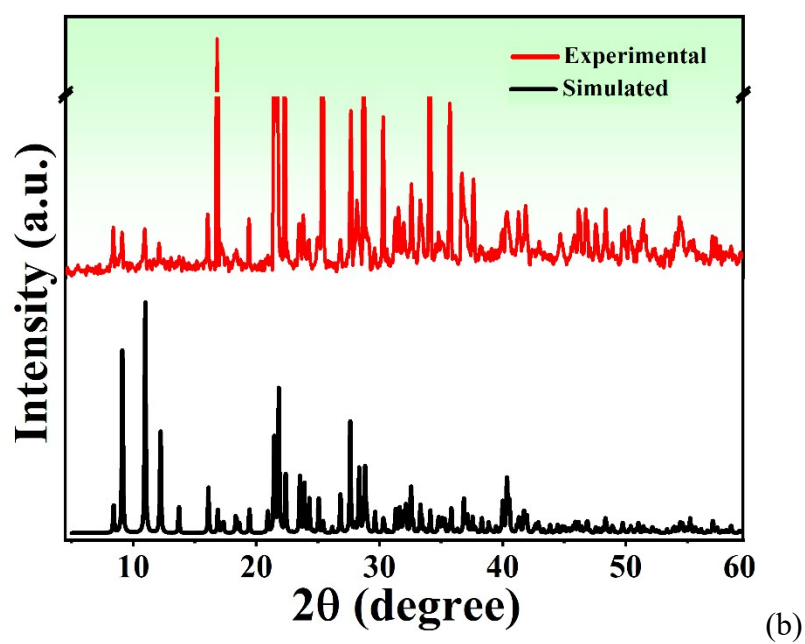

**Figure S2.** The simulated and experimental XRD patterns of  $[\text{H}_4\text{BAPP}]\text{SnBr}_5 \cdot \text{Br}$  (a) and  $[\text{H}_4\text{BAPP}]\text{SnCl}_5 \cdot \text{Cl} \cdot \text{H}_2\text{O}$  (b).

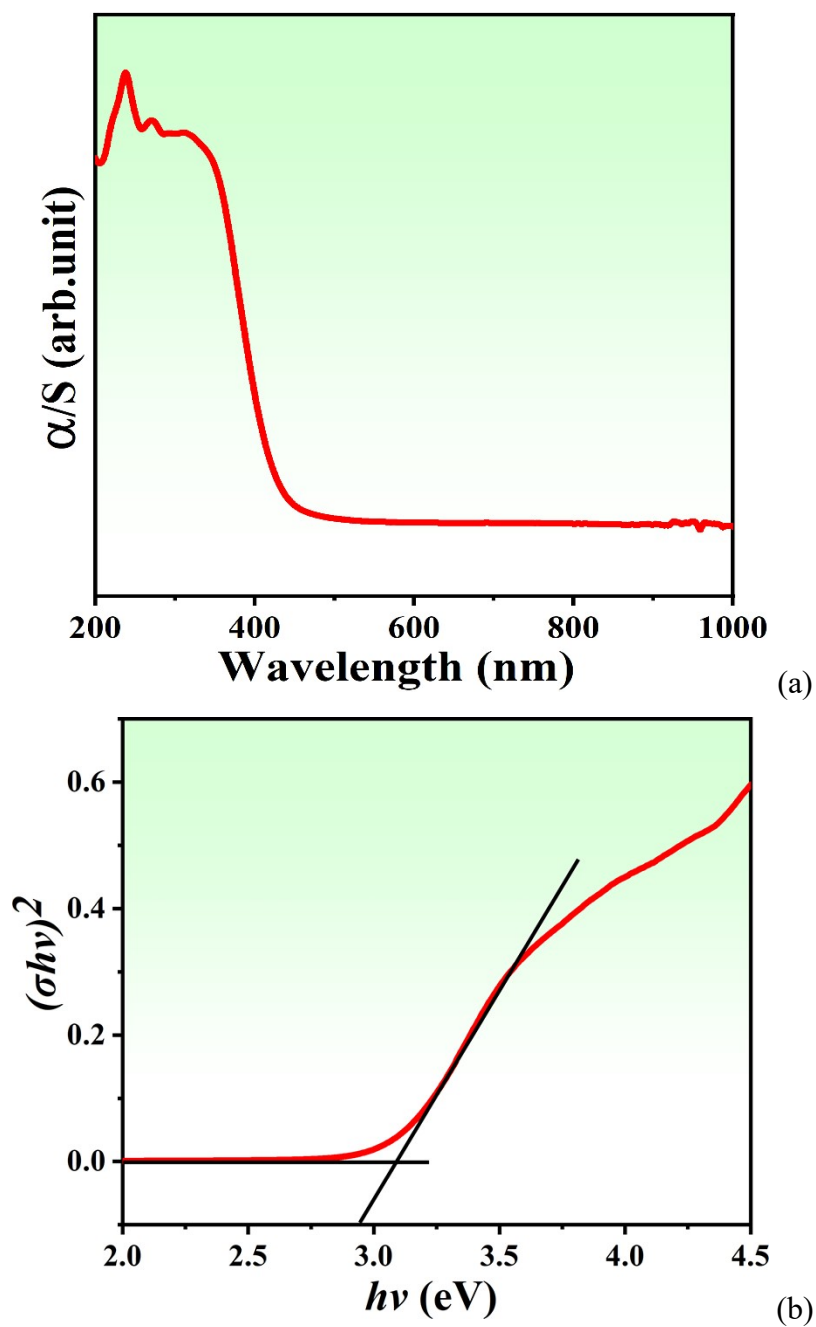

**Figure S3.** The solid state UV-vis adsorption spectra (a) and Tauc plot for band gap (b) of  $[\text{H}_4\text{BAPP}]\text{SnBr}_5\cdot\text{Br}$ .

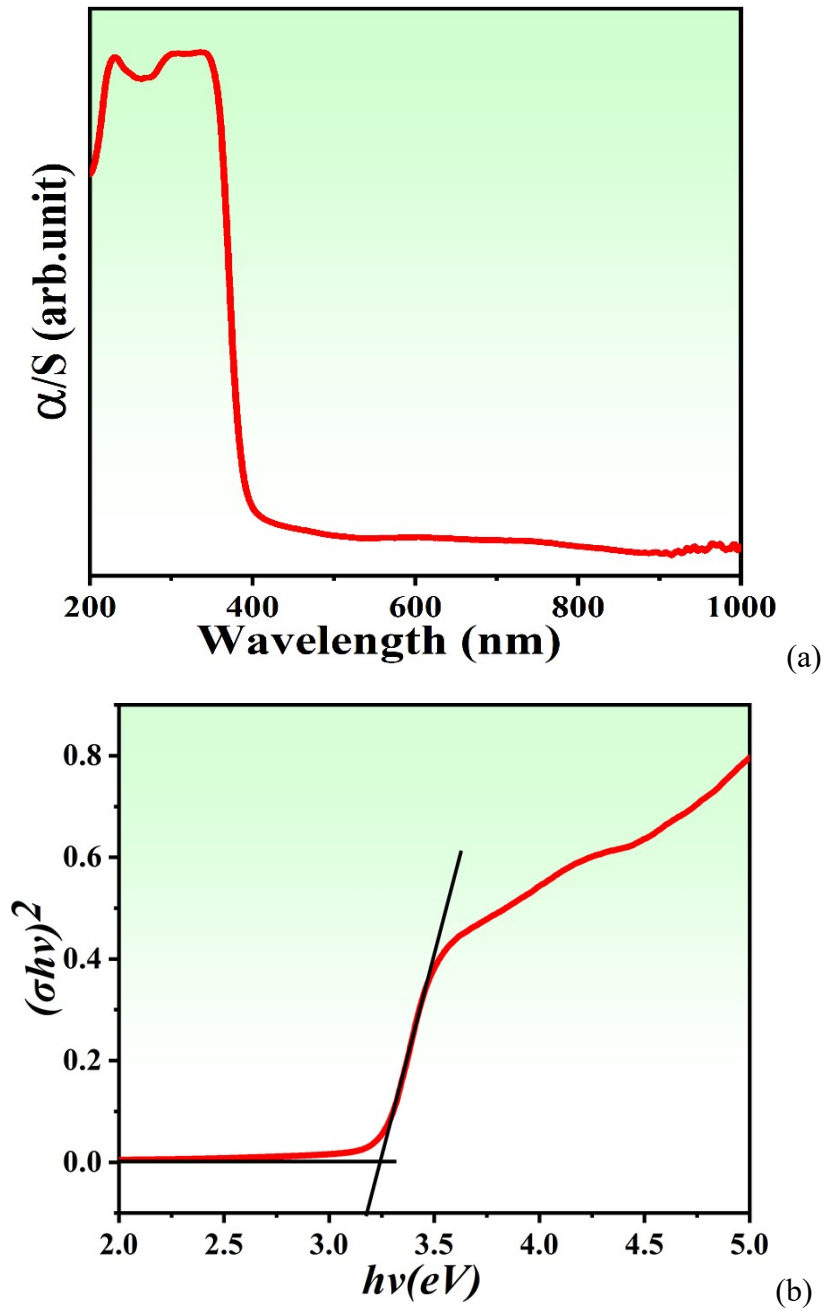

**Figure S4.** The solid state UV-vis adsorption spectra (a) and Tauc plot for band gap (b) of  $[\text{H}_4\text{BAPP}]\text{SnCl}_5 \cdot \text{Cl} \cdot \text{H}_2\text{O}$ .

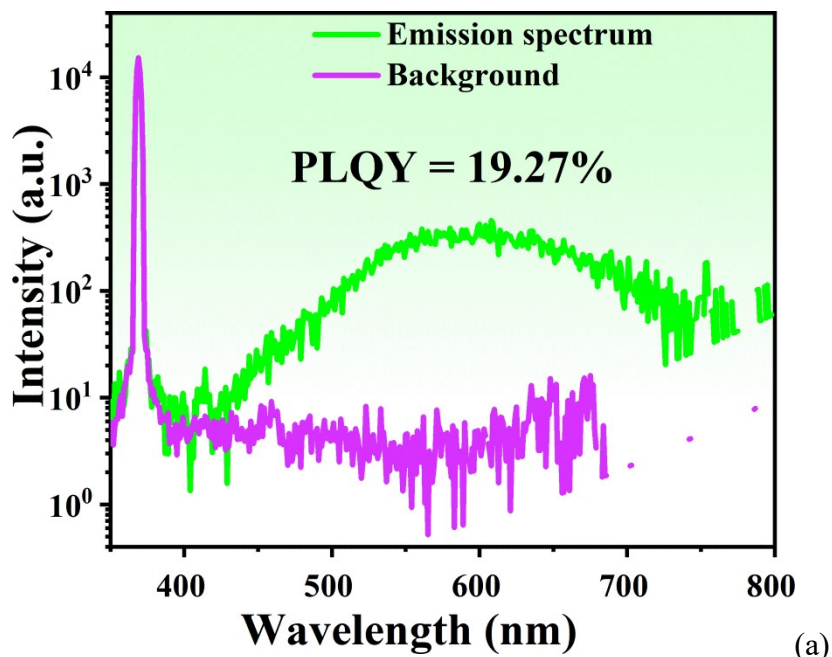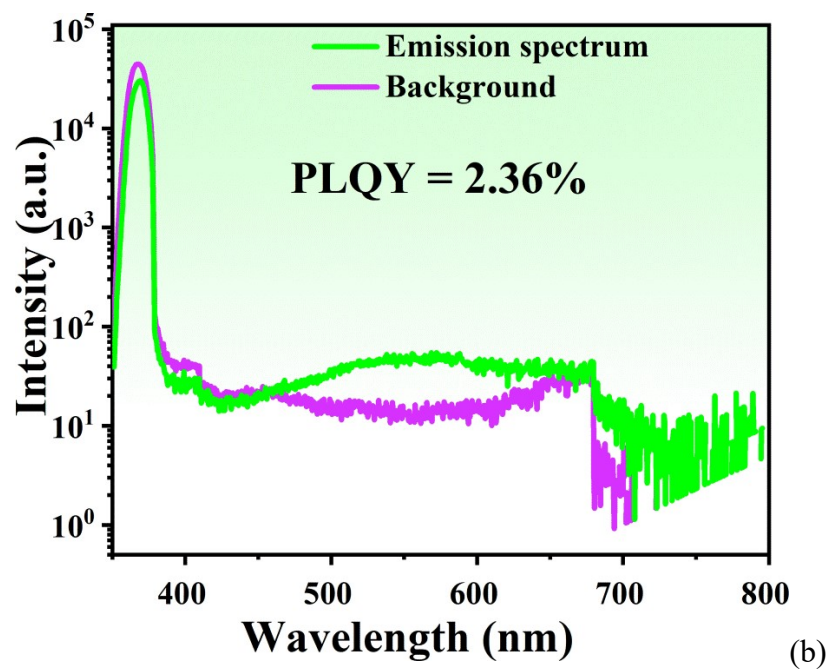

Figure S5. The PLQYs of  $[\text{H}_4\text{BAPP}]\text{SnBr}_5 \cdot \text{Br}$  (a) and  $[\text{H}_4\text{BAPP}]\text{SnCl}_5 \cdot \text{Cl} \cdot \text{H}_2\text{O}$  (b).

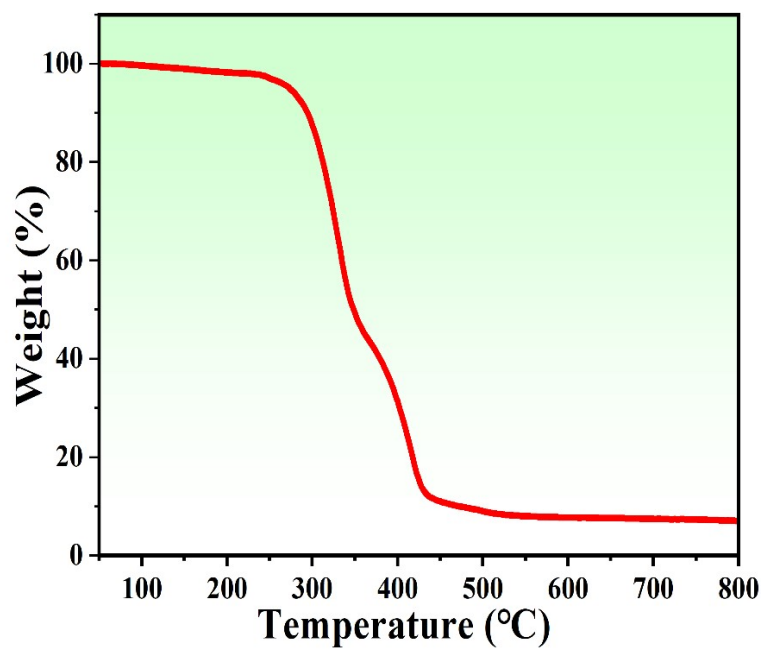

**Figure S6.** The thermogravimetric analyses (TGA) curve for  $[\text{H}_4\text{BAPP}]\text{SnBr}_5 \cdot \text{Br}$ .

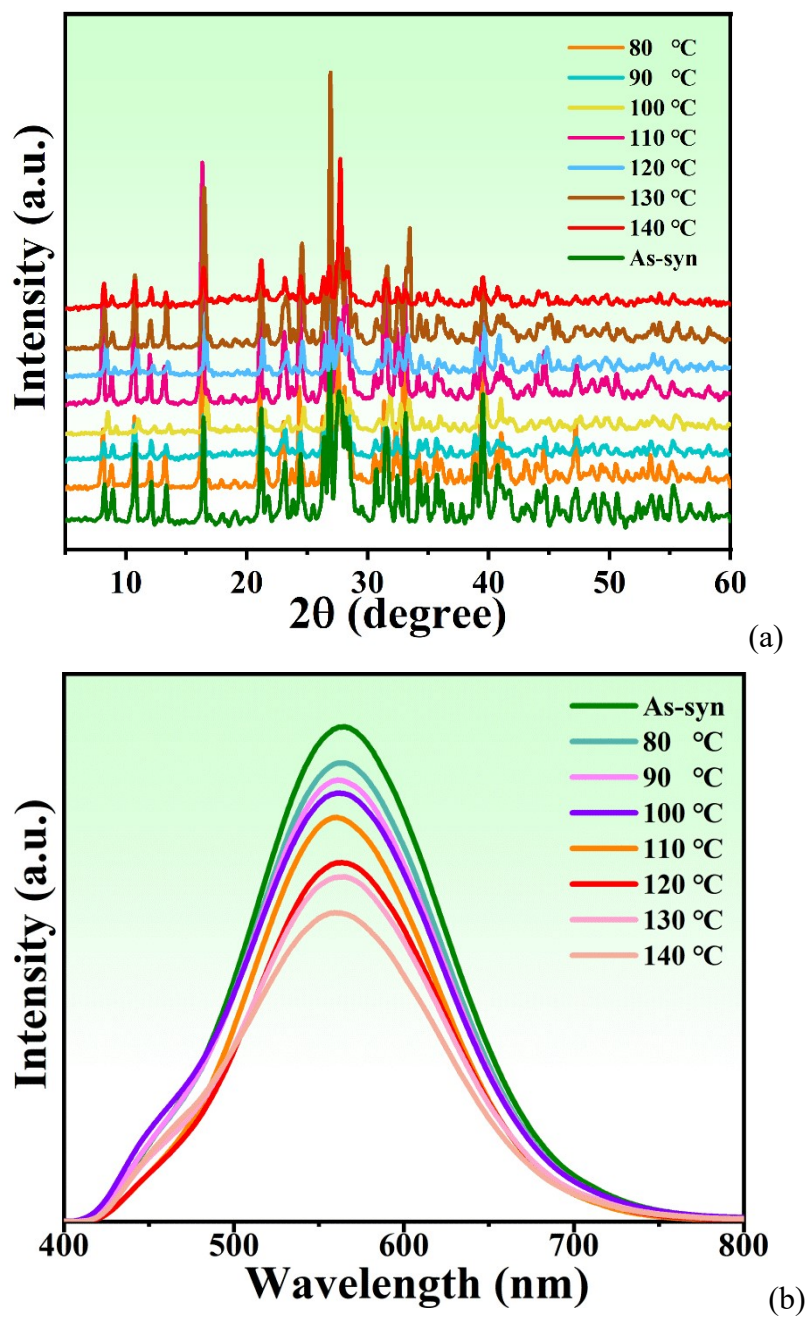

**Figure S7.** (a) The PXRD and (b) PL emission spectra of  $[\text{H}_4\text{BAPP}]\text{SnBr}_5 \cdot \text{Br}$  at different temperature.



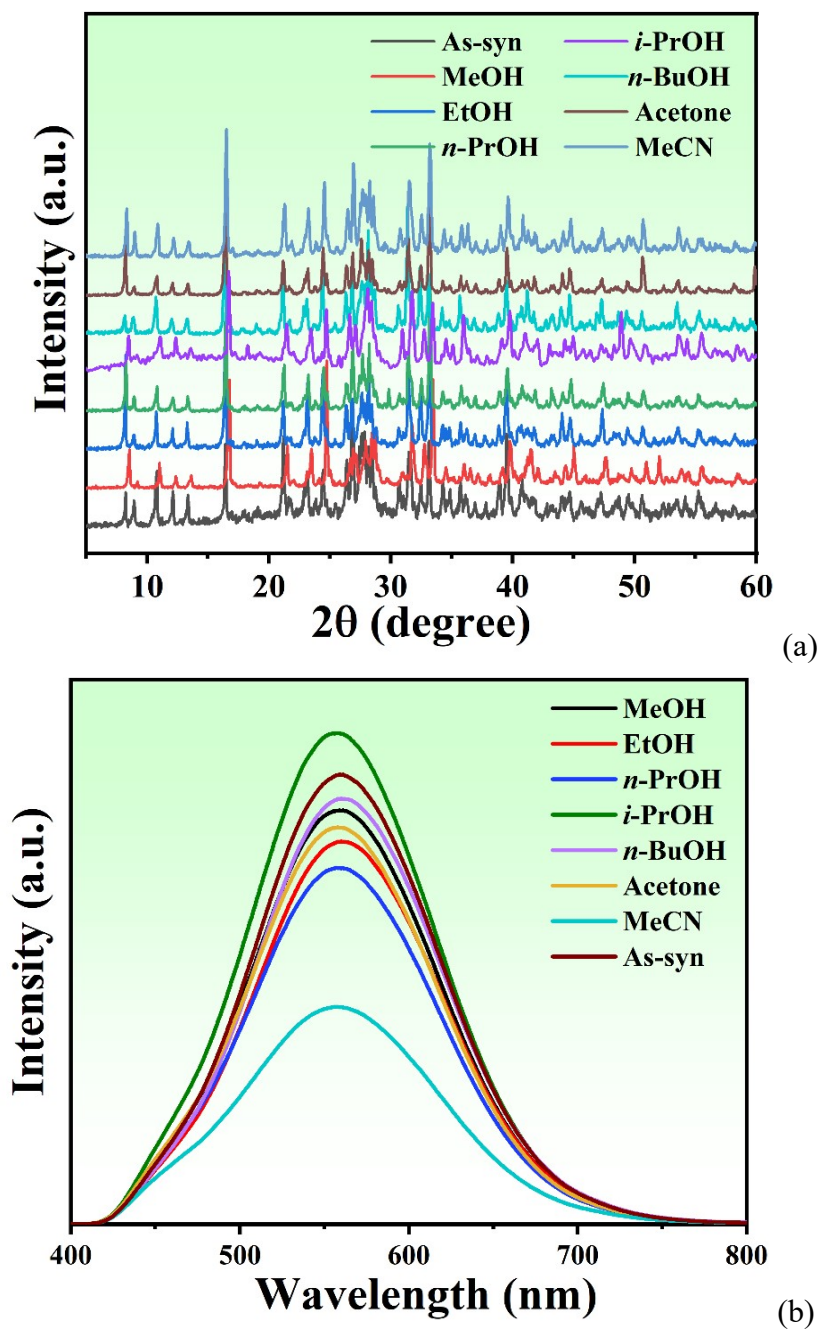

**Figure S8.** (a) The PXRD and (b) PL emission spectra of [H<sub>4</sub>BAPP]SnBr<sub>5</sub>·Br after soaking in various organic solutions over one day.

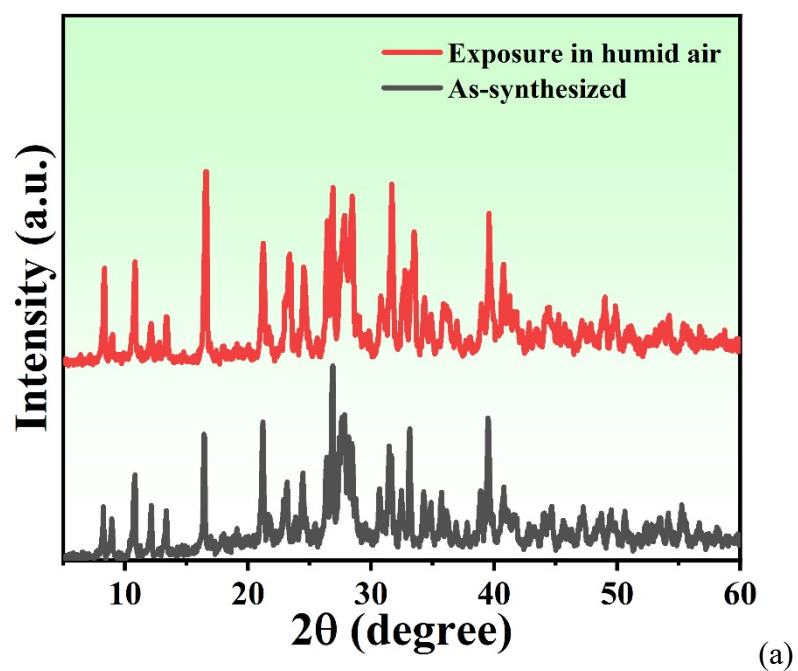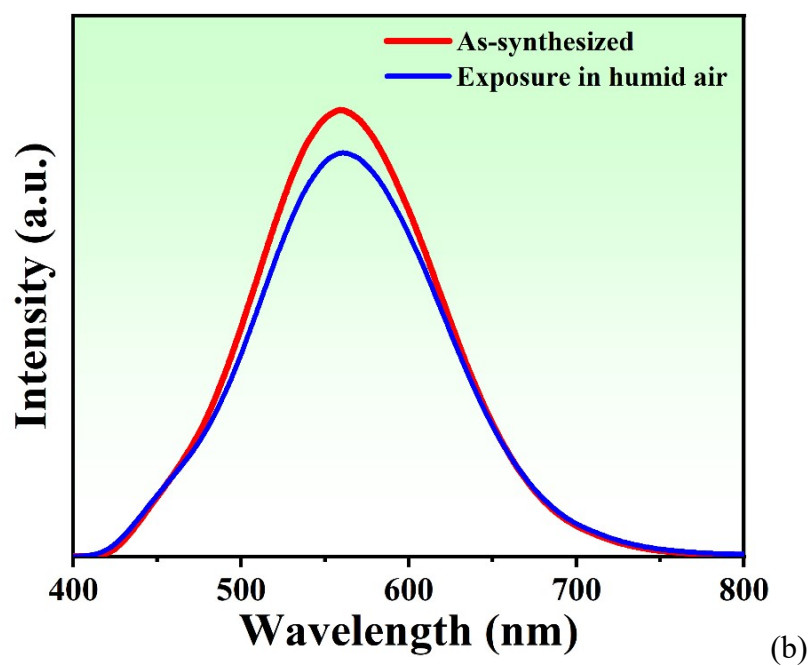

**Figure S9.** (a) The PXRD and (b) PL emission spectra of as-synthesized [H<sub>4</sub>BAPP]SnBr<sub>5</sub>·Br crystals after exposure in humid air for 30 days.

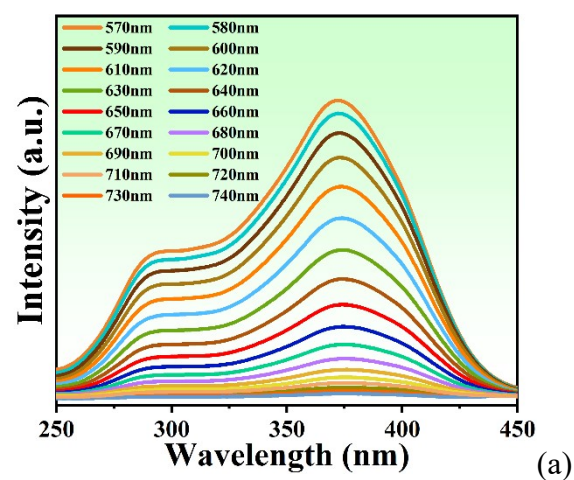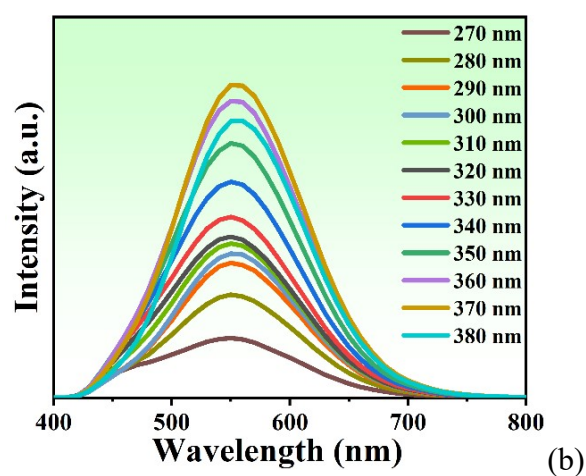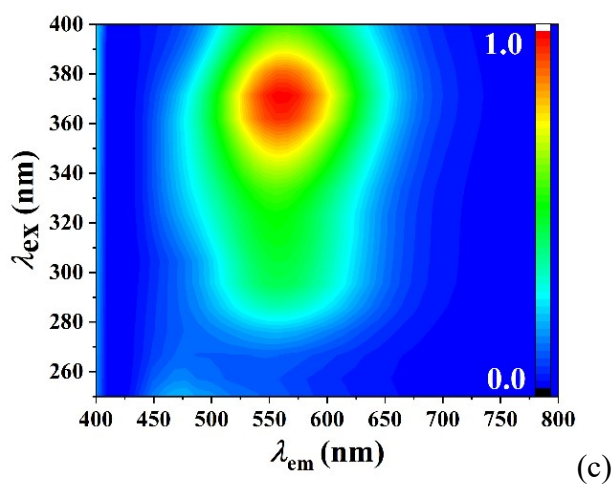

**Figure S10.** The emission wavelength dependent PL excitation spectra (a), the excitation wavelength dependent PL emission spectra (b) and 3D consecutive PL excitation and emission correlation map of  $[\text{H}_4\text{BAPP}]\text{SnBr}_5 \cdot \text{Br}$ .

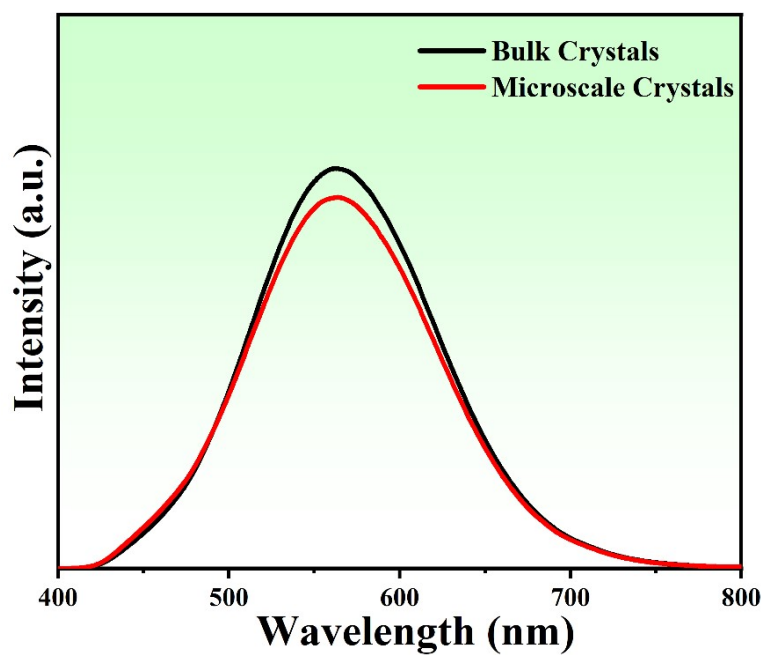

**Figure S11.** The bulk crystals and microscale crystals PL emission spectra of  $[\text{H}_4\text{BAPP}]\text{SnBr}_5 \cdot \text{Br}$ .

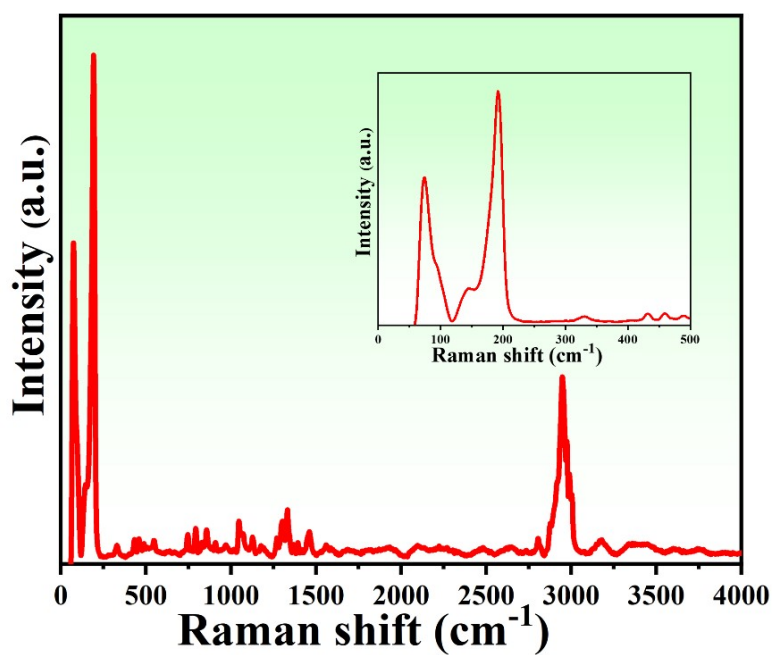

**Figure S12.** The Raman spectrum of  $[\text{H}_4\text{BAPP}]\text{SnBr}_5 \cdot \text{Br}$  at 300 K.

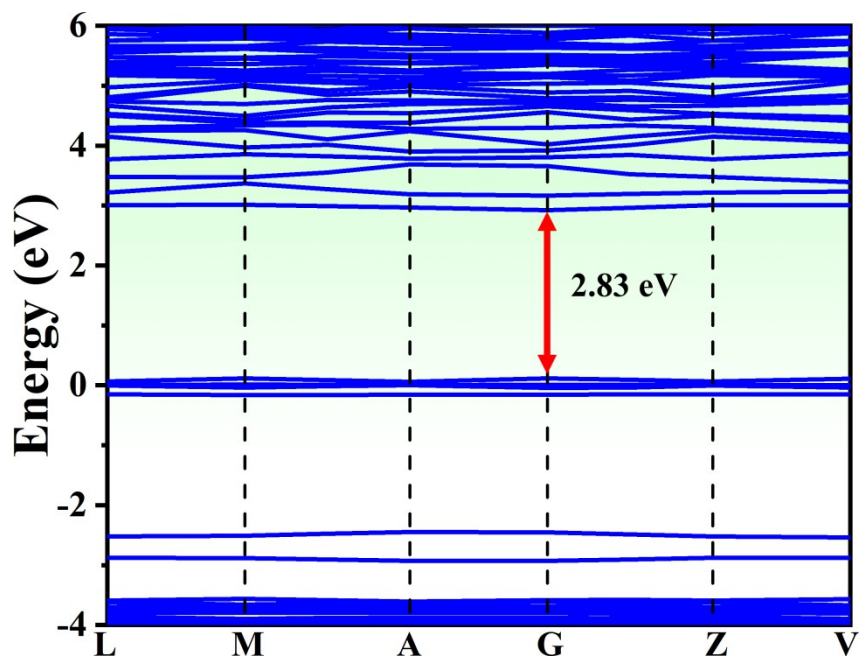

Figure S13. Band structure of  $[\text{H}_4\text{BAPP}]\text{SnCl}_5 \cdot \text{Cl} \cdot \text{H}_2\text{O}$

**Table S1.** Crystal Data and Structural Refinements for [H<sub>4</sub>BAPP]SnBr<sub>5</sub>·Br and [H<sub>4</sub>BAPP]SnCl<sub>5</sub>·Cl·H<sub>2</sub>O.

| Compound                                                                                 | [H <sub>4</sub> BAPP]SnBr <sub>5</sub> ·Br                        | [H <sub>4</sub> BAPP]SnCl <sub>5</sub> ·Cl·H <sub>2</sub> O        |
|------------------------------------------------------------------------------------------|-------------------------------------------------------------------|--------------------------------------------------------------------|
| chemical formula                                                                         | C <sub>10</sub> H <sub>28</sub> Br <sub>6</sub> N <sub>4</sub> Sn | C <sub>10</sub> H <sub>28</sub> Cl <sub>6</sub> N <sub>4</sub> OSn |
| FW                                                                                       | 802.51                                                            | 551.75                                                             |
| Space group                                                                              | <i>C2/m</i> (No. 12)                                              | <i>C2/m</i> (No. 12)                                               |
| <i>a</i> /Å                                                                              | 15.7684(6)                                                        | 15.518(8)                                                          |
| <i>b</i> /Å                                                                              | 13.2865(5)                                                        | 12.908(7)                                                          |
| <i>c</i> /Å                                                                              | 11.4134(6)                                                        | 11.136(8)                                                          |
| $\alpha$ /°                                                                              | 90                                                                | 90                                                                 |
| $\beta$ /°                                                                               | 108.406(2)                                                        | 109.40(2)                                                          |
| $\gamma$ /°                                                                              | 90                                                                | 90                                                                 |
| <i>V</i> (Å <sup>3</sup> )                                                               | 2268.86(17)                                                       | 2104(2)                                                            |
| D <sub>calcd</sub> (g·cm <sup>-3</sup> )                                                 | 2.349                                                             | 1.742                                                              |
| Temp (K)                                                                                 | 293.15                                                            | 293.15                                                             |
| $\mu$ (mm <sup>-1</sup> )                                                                | 11.692                                                            | 1.981                                                              |
| <i>F</i> (000)                                                                           | 1504.0                                                            | 1104.0                                                             |
| Reflections collected                                                                    | 20010                                                             | 23458                                                              |
| Unique reflections                                                                       | 2180                                                              | 2729                                                               |
| GOF on <i>F</i> <sup>2</sup>                                                             | 1.040                                                             | 1.067                                                              |
| <sup>a</sup> <i>R</i> <sub>1</sub> , <i>wR</i> <sub>2</sub> ( <i>I</i> > 2σ( <i>I</i> )) | 0.0430/ 0.1202                                                    | 0.0410/ 0.1089                                                     |
| <sup>b</sup> <i>R</i> <sub>1</sub> , <i>wR</i> <sub>2</sub> (all data)                   | 0.0485/ 0.1251                                                    | 0.0467/ 0.1134                                                     |

<sup>a</sup>*R*<sub>1</sub> =  $\sum ||F_o| - |F_c|| / \sum |F_o|$ .    <sup>b</sup>*wR*<sub>2</sub> =  $[\sum w(F_o^2 - F_c^2)^2 / \sum w(F_o^2)^2]^{1/2}$ .

**Table S2.** Selected bond lengths (Å) and bond angles (°) in [H<sub>4</sub>BAPP]SnBr<sub>5</sub>·Br.

---

|                          |            |                          |            |
|--------------------------|------------|--------------------------|------------|
| Sn1-Br1                  | 2.7818(13) | Sn1-Br2 <sup>1</sup>     | 2.9696(7)  |
| Sn1-Br2                  | 2.9696(7)  | Sn1-Br3                  | 2.6765(12) |
| Sn1-Br5                  | 3.1780(12) |                          |            |
| Br1-Sn1-Br2 <sup>1</sup> | 89.208(19) | Br1-Sn1-Br2              | 89.208(19) |
| Br2-Sn1-Br2 <sup>1</sup> | 174.51(4)  | Br3-Sn1-Br1              | 87.49(4)   |
| Br3-Sn1-Br2              | 87.341(18) | Br3-Sn1-Br2 <sup>1</sup> | 87.342(18) |

---

<sup>1</sup>+X,-Y,+Z; <sup>2</sup>3/2-X,-1/2-Y,-2-Z

**Table S3.** Hydrogen bonds data for [H<sub>4</sub>BAPP]SnBr<sub>5</sub>·Br.

---

| D-H···A      | d(D-H) | d(H···A) | d(D···A) | <(DHA) |
|--------------|--------|----------|----------|--------|
| N1-H1A···Br5 | 0.890  | 2.598    | 3.430    | 155.96 |
| N1-H1B···Br2 | 0.890  | 2.705    | 3.478    | 145.79 |
| N1-H1C···Br4 | 0.890  | 2.418    | 3.302    | 172.46 |
| C1-H1D···Br5 | 0.970  | 3.097    | 3.957    | 148.55 |
| C1-H1E···Br2 | 0.970  | 2.960    | 3.768    | 141.46 |
| C1-H1E···Br3 | 0.970  | 2.981    | 3.716    | 133.48 |
| N2-H2···Br2  | 0.980  | 2.463    | 3.312    | 144.75 |
| N2-H2···Br3  | 0.980  | 3.129    | 3.807    | 127.52 |
| C2-H2B···Br1 | 0.970  | 3.062    | 3.869    | 141.65 |
| C3-H3A···Br1 | 0.970  | 3.003    | 3.911    | 156.30 |
| C3-H3B···Br5 | 0.970  | 2.894    | 3.821    | 160.40 |
| C4-H4A···Br1 | 0.970  | 3.114    | 4.007    | 153.66 |
| C4-H4A···Br3 | 0.970  | 2.988    | 3.687    | 129.92 |
| C4-H4B···Br4 | 0.970  | 2.906    | 3.625    | 131.79 |
| C5-H5A···Br2 | 0.970  | 3.052    | 3.756    | 130.55 |
| C5-H5B···Br3 | 0.970  | 3.057    | 3.617    | 118.13 |
| C5-H5B···Br4 | 0.970  | 3.107    | 3.637    | 115.90 |

---



**Table S4.** Selected bond lengths (Å) and bond angles (°) in [H<sub>4</sub>BAPP]SnCl<sub>5</sub>·Cl·H<sub>2</sub>O.

|                          |            |                          |            |
|--------------------------|------------|--------------------------|------------|
| Sn1-Cl1                  | 2.677(2)   | Sn1-Cl2 <sup>1</sup>     | 2.8249(19) |
| Sn1-Cl2                  | 2.8249(19) | Sn1-Cl3                  | 2.5133(19) |
| Sn1-Cl5                  | 3.0740(65) |                          |            |
| Cl1-Sn1-Cl2 <sup>1</sup> | 89.22(2)   | Cl1-Sn1-Cl2              | 89.22(2)   |
| Cl2-Sn1-Cl2 <sup>1</sup> | 172.32(4)  | Cl3-Sn1-Cl1              | 87.36(7)   |
| Cl3-Sn1-Cl2              | 86.21(2)   | Cl3-Sn1-Cl2 <sup>1</sup> | 86.21(2)   |

<sup>1</sup>+X,-Y,+Z; <sup>2</sup>-1/2-X,1/2-Y,-Z

**Table S5.** Hydrogen bonds data for [H<sub>4</sub>BAPP]SnCl<sub>5</sub>·Cl·H<sub>2</sub>O.

| D-H···A      | d(D-H) | d(H···A) | d(D···A) | <(DHA) |
|--------------|--------|----------|----------|--------|
| N1-H1A···Cl4 | 0.890  | 2.238    | 3.126    | 174.82 |
| N1-H1B···Cl2 | 0.890  | 2.914    | 3.328    | 110.22 |
| N1-H1C···O1  | 0.890  | 2.309    | 3.175    | 164.40 |
| C1-H1D···Cl2 | 0.970  | 2.984    | 3.745    | 136.21 |
| C1-H1D···Cl3 | 0.970  | 2.854    | 3.665    | 141.71 |
| C1-H1E···Cl5 | 0.970  | 2.906    | 3.755    | 146.85 |
| N2-H2···Cl2  | 0.980  | 2.286    | 3.155    | 147.27 |
| C2-H2A···Cl1 | 0.970  | 2.912    | 3.740    | 143.85 |
| C3-H3A···Cl1 | 0.970  | 2.879    | 3.869    | 155.41 |
| C3-H3B···Cl5 | 0.970  | 2.851    | 3.693    | 145.81 |
| C4-H4A···Cl4 | 0.970  | 2.815    | 3.528    | 131.01 |
| C4-H4B···Cl1 | 0.970  | 2.939    | 3.834    | 153.99 |
| C4-H4B···Cl3 | 0.970  | 2.894    | 3.596    | 130.05 |
| C5-H5A···Cl2 | 0.970  | 2.955    | 3.653    | 129.76 |

**Table S6.** Summarized PLQYs for different samples after soaking in various organic solvents.

| Sample         | PLQY   |
|----------------|--------|
| As-synthesized | 19.27% |
| EtOH           | 15.29% |
| <i>n</i> -PrOH | 18.90% |
| <i>i</i> -PrOH | 20.72% |
| Acetone        | 17.15% |
| MeCN           | 14.03% |
